# Supplementary material
Source: MDPI journal article supplement (https://www.mdpi.com/2673-6357/4/4/27)
Supplement: s1 [file s1]

# Supplementary Materials

## Geographic Prevalence Patterns and Modifiable Risk Factors for Monoclonal Gammopathy of undetermined significance

Karina Verma <sup>1</sup>, Rebecca Steuer <sup>1</sup>, David B. Flynn <sup>2</sup> and Camille Vanessa Edwards <sup>2,3,\*</sup>

Table S1. Prisma checklist .

| Section/topic                      | #  | Checklist item                                                                                                                                                                                                                                                                                              | Reported on page # |
|------------------------------------|----|-------------------------------------------------------------------------------------------------------------------------------------------------------------------------------------------------------------------------------------------------------------------------------------------------------------|--------------------|
| <b>TITLE</b>                       |    |                                                                                                                                                                                                                                                                                                             |                    |
| Title                              | 1  | Identify the report as a systematic review, meta-analysis, or both.                                                                                                                                                                                                                                         | 1                  |
| <b>ABSTRACT</b>                    |    |                                                                                                                                                                                                                                                                                                             |                    |
| Structured summary                 | 2  | Provide a structured summary including, as applicable: background; objectives; data sources; study eligibility criteria, participants, and interventions; study appraisal and synthesis methods; results; limitations; conclusions and implications of key findings; systematic review registration number. | 1                  |
| <b>INTRODUCTION</b>                |    |                                                                                                                                                                                                                                                                                                             |                    |
| Rationale                          | 3  | Describe the rationale for the review in the context of what is already known.                                                                                                                                                                                                                              | 1-2                |
| Objectives                         | 4  | Provide an explicit statement of questions being addressed with reference to participants, interventions, comparisons, outcomes, and study design (PICOS).                                                                                                                                                  | 2                  |
| <b>METHODS</b>                     |    |                                                                                                                                                                                                                                                                                                             |                    |
| Protocol and registration          | 5  | Indicate if a review protocol exists, if and where it can be accessed (e.g., Web address), and, if available, provide registration information including registration number.                                                                                                                               | 2                  |
| Eligibility criteria               | 6  | Specify study characteristics (e.g., PICOS, length of follow-up) and report characteristics (e.g., years considered, language, publication status) used as criteria for eligibility, giving rationale.                                                                                                      | 2-3                |
| Information sources                | 7  | Describe all information sources (e.g., databases with dates of coverage, contact with study authors to identify additional studies) in the search and date last searched.                                                                                                                                  | 2                  |
| Search                             | 8  | Present full electronic search strategy for at least one database, including any limits used, such that it could be repeated.                                                                                                                                                                               | 2-3                |
| Study selection                    | 9  | State the process for selecting studies (i.e., screening, eligibility, included in systematic review, and, if applicable, included in the meta-analysis).                                                                                                                                                   | 2-3                |
| Data collection process            | 10 | Describe method of data extraction from reports (e.g., piloted forms, independently, in duplicate) and any processes for obtaining and confirming data from investigators.                                                                                                                                  | 3                  |
| Data items                         | 11 | List and define all variables for which data were sought (e.g., PICOS, funding sources) and any assumptions and simplifications made.                                                                                                                                                                       | 3                  |
| Risk of bias in individual studies | 12 | Describe methods used for assessing risk of bias of individual studies (including specification of whether this was done at the study or outcome level), and how this information is to be used in any data synthesis.                                                                                      | 3                  |
| Summary measures                   | 13 | State the principal summary measures (e.g., risk ratio, difference in means).                                                                                                                                                                                                                               | 3                  |
| Synthesis of results               | 14 | Describe the methods of handling data and combining results of studies, if done, including measures of consistency (e.g., $I^2$ ) for each meta-analysis.                                                                                                                                                   | N/A                |
| Reporting bias assessment          |    | Describe any methods used to assess risk of bias due to missing results in a synthesis (arising from reporting biases).                                                                                                                                                                                     | N/A                |
| Certainty assessment               |    | Describe any methods used to assess certainty (or confidence) in the body of evidence for an outcome.                                                                                                                                                                                                       | N/A                |
| <b>RESULTS</b>                     |    |                                                                                                                                                                                                                                                                                                             |                    |

|                                                |     |                                                                                                                                                                                                                                                                                      |                   |
|------------------------------------------------|-----|--------------------------------------------------------------------------------------------------------------------------------------------------------------------------------------------------------------------------------------------------------------------------------------|-------------------|
| Study selection                                | 16a | Describe the results of the search and selection process, from the number of records identified in the search to the number of studies included in the review, ideally using a flow diagram.                                                                                         | 3-4               |
|                                                | 16b | Cite studies that might appear to meet the inclusion criteria, but which were excluded, and explain why they were excluded.                                                                                                                                                          | 3-4               |
| Study characteristics                          | 17  | Cite each included study and present its characteristics.                                                                                                                                                                                                                            | 4-12              |
| Risk of bias in studies                        | 18  | Present assessments of risk of bias for each included study.                                                                                                                                                                                                                         |                   |
| Results of individual studies                  | 19  | For all outcomes, present, for each study: (a) summary statistics for each group (where appropriate) and (b) an effect estimate and its precision (e.g. confidence/credible interval), ideally using structured tables or plots.                                                     | 4-12              |
| Results of syntheses                           | 20a | For each synthesis, briefly summarise the characteristics and risk of bias among contributing studies.                                                                                                                                                                               | Supplemental data |
|                                                | 20b | Present results of all statistical syntheses conducted. If meta-analysis was done, present for each the summary estimate and its precision (e.g. confidence/credible interval) and measures of statistical heterogeneity. If comparing groups, describe the direction of the effect. | N/A               |
|                                                | 20c | Present results of all investigations of possible causes of heterogeneity among study results.                                                                                                                                                                                       | N/A               |
|                                                | 20d | Present results of all sensitivity analyses conducted to assess the robustness of the synthesized results.                                                                                                                                                                           | N/A               |
| Reporting biases                               | 21  | Present assessments of risk of bias due to missing results (arising from reporting biases) for each synthesis assessed.                                                                                                                                                              | N/A               |
| Certainty of evidence                          | 22  | Present assessments of certainty (or confidence) in the body of evidence for each outcome assessed.                                                                                                                                                                                  | 4-12              |
| <b>DISCUSSION</b>                              |     |                                                                                                                                                                                                                                                                                      |                   |
| Discussion                                     | 23a | Provide a general interpretation of the results in the context of other evidence.                                                                                                                                                                                                    | 12-13             |
|                                                | 23b | Discuss any limitations of the evidence included in the review.                                                                                                                                                                                                                      | 13-14             |
|                                                | 23c | Discuss any limitations of the review processes used.                                                                                                                                                                                                                                | 13-14             |
|                                                | 23d | Discuss implications of the results for practice, policy, and future research.                                                                                                                                                                                                       | 14                |
| <b>OTHER INFORMATION</b>                       |     |                                                                                                                                                                                                                                                                                      |                   |
| Registration and protocol                      | 24a | Provide registration information for the review, including register name and registration number, or state that the review was not registered.                                                                                                                                       | 2                 |
|                                                | 24b | Indicate where the review protocol can be accessed, or state that a protocol was not prepared.                                                                                                                                                                                       | 2                 |
|                                                | 24c | Describe and explain any amendments to information provided at registration or in the protocol.                                                                                                                                                                                      | N/A               |
| Support                                        | 25  | Describe sources of financial or non-financial support for the review, and the role of the funders or sponsors in the review.                                                                                                                                                        | N/A               |
| Competing interests                            | 26  | Declare any competing interests of review authors.                                                                                                                                                                                                                                   | N/A               |
| Availability of data, code and other materials | 27  | Report which of the following are publicly available and where they can be found: template data collection forms; data extracted from included studies; data used for all analyses; analytic code; any other materials used in the review.                                           | 2-3               |

**Table S2.** Quality of observational cohort and cross-sectional studies included in the systematic review – Risk Factors.

| Study quality assessment tool*                                                                                                                                                                                                                 | Saleun <sup>59</sup><br>(1982) | Brown <sup>62</sup><br>(2008) | Orban <sup>64</sup><br>(2017) | Iwanaga <sup>65</sup><br>(2009) | Fujimara <sup>66</sup><br>(2021) | Landgren <sup>69</sup><br>(2009) | Hofman <sup>70</sup><br>(2021) | Schmidt <sup>72</sup><br>(2019) | Landgren <sup>73</sup><br>(2010) | Thordardottir <sup>74</sup><br>(2017) | Thordardottir <sup>49</sup><br>(2018) |
|------------------------------------------------------------------------------------------------------------------------------------------------------------------------------------------------------------------------------------------------|--------------------------------|-------------------------------|-------------------------------|---------------------------------|----------------------------------|----------------------------------|--------------------------------|---------------------------------|----------------------------------|---------------------------------------|---------------------------------------|
| 1. Was the research question clearly stated?                                                                                                                                                                                                   | Yes                            | Yes                           | Yes                           | Yes                             | Yes                              | Yes                              | Yes                            | Yes                             | Yes                              | Yes                                   | Yes                                   |
| 2. Was the study population properly specified or defined?                                                                                                                                                                                     | Yes                            | Yes                           | Yes                           | Yes                             | Yes                              | Yes                              | Yes                            | Yes                             | Yes                              | Yes                                   | Yes                                   |
| 3. Was the participation rate of eligible persons at least 50%                                                                                                                                                                                 | Yes                            | Yes                           | Yes                           | Yes                             | Yes                              | Yes                              | Yes                            | Yes                             | Yes                              | Yes                                   | Yes                                   |
| 4. Were all the subjects selected or recruited from the same or similar populations (including the same time period)? Were the inclusion and exclusion criteria for being in the study prespecified and applied uniformly to all participants? | Yes                            | Yes                           | Yes                           | Yes                             | Yes                              | Yes                              | Yes                            | Yes                             | Yes                              | Yes                                   | Yes                                   |
| 5. Was a sample size justification, power descriptions, or variance and effect estimates provided?                                                                                                                                             | No                             | No                            | Yes                           | No                              | No                               | No                               | Yes                            | Yes                             | No                               | No                                    | No                                    |
| 6. For the analyses in this paper, were the exposure(s) of interest measured prior to the outcome(s) being measured?                                                                                                                           | Yes                            | No                            | Yes                           | Yes                             | Yes                              | Yes                              | Yes                            | Yes                             | Yes                              | Yes                                   | Yes                                   |
| 7. Was the timeframe sufficient so that one could reasonable expect to see an association between exposure and outcome if it existed?                                                                                                          | Yes                            | Yes                           | Yes                           | Yes                             | Yes                              | Yes                              | Yes                            | Yes                             | Yes                              | Yes                                   | Yes                                   |
| 8. For exposures that can vary in amount or level, did the study examine different levels of the exposure as related to the outcome (e.g. categories of exposure, or exposure measured as continuous variable)?                                | *                              | *                             | Yes                           | Yes                             | Yes                              | No                               | Yes                            | Yes                             | No                               | Yes                                   | Yes                                   |
| 9. Were the exposure measures (independent variables) clearly defined, valid, reliable, and                                                                                                                                                    | Yes                            | Yes                           | Yes                           | Yes                             | Yes                              | Yes                              | Yes                            | Yes                             | Yes                              | Yes                                   | Yes                                   |

|                                                                                                                                                           |     |     |     |     |     |     |     |     |     |     |     |
|-----------------------------------------------------------------------------------------------------------------------------------------------------------|-----|-----|-----|-----|-----|-----|-----|-----|-----|-----|-----|
| implemented consistently across all study participants?                                                                                                   |     |     |     |     |     |     |     |     |     |     |     |
| 10. Was the exposure(s) assessed more than once over time?                                                                                                | No  | Yes | Yes | No  | No  | No  | Yes | Yes | No  | No  | Yes |
| 11. Were the outcome measures (dependent variable) clearly defined, valid, reliable, and implemented consistently across all study participants?          | Yes |
| 12. Were the outcome assessors blinded to the exposure status of participants?                                                                            | No  | No  | *   | No  | No  | *   | Yes | *   | *   | Yes | Yes |
| 13. Was loss to follow-up after baseline 20% or less?                                                                                                     | *   | Yes | Yes | *   | *   | Yes | Yes | Yes | *   | Yes | Yes |
| 14. Were key potential confounding variables measured and adjusted statistically for their impact on the relationship between exposure(s) and outcome(s)? | No  | No  | Yes |
| <b>Total</b>                                                                                                                                              | 8   | 9   | 13  | 10  | 10  | 10  | 14  | 13  | 9   | 12  | 13  |

Yes = 1; No = 0; Unable to determine = 0. \*unable to determine; <https://www.nhlbi.nih.gov/health-topics/study-quality-assessment-tools>

8

9

**Table S3.** Quality of case-control studies included in the systematic review - Risk Factors.

10

| Study quality assessment tool*                                                                                                                                                                                | Boursi <sup>61</sup><br>(2012) | Lindqvist <sup>63</sup><br>(2011) | Pasqualetti <sup>67</sup><br>(1996) | Landgren <sup>68</sup><br>(2015) | Pasqualetti <sup>71</sup><br>(1997) | Thoradordottir <sup>49</sup><br>(2018) |
|---------------------------------------------------------------------------------------------------------------------------------------------------------------------------------------------------------------|--------------------------------|-----------------------------------|-------------------------------------|----------------------------------|-------------------------------------|----------------------------------------|
| 1. Was the research question or objective in this paper clearly stated and appropriate?                                                                                                                       | Yes                            | Yes                               | Yes                                 | Yes                              | Yes                                 | Yes                                    |
| 2. Was the study population clearly specified and defined?                                                                                                                                                    | Yes                            | Yes                               | Yes                                 | Yes                              | Yes                                 | Yes                                    |
| 3. Did the authors include a sample size justification?                                                                                                                                                       | No                             | No                                | No                                  | Yes                              | No                                  | No                                     |
| 4. Were controls selected or recruited from the same or similar population that gave rise to the cases (including the same timeframe)?                                                                        | Yes                            | Yes                               | Yes                                 | Yes                              | Yes                                 | Yes                                    |
| 5. Were the definitions, inclusion and exclusion criteria, algorithms or processes used to identify or select cases and controls valid, reliable, and implemented consistently across all study participants? | Yes                            | Yes                               | Yes                                 | Yes                              | Yes                                 | Yes                                    |
| 6. Were the cases clearly defined and differentiated from controls?                                                                                                                                           | Yes                            | Yes                               | Yes                                 | Yes                              | Yes                                 | Yes                                    |
| 7. If less than 100 percent of eligible cases and/or controls were selected for the study, were the cases and/or controls randomly selected from those eligible?                                              | *                              | *                                 | *                                   | Yes                              | *                                   | *                                      |
| 8. Was there use of concurrent controls?                                                                                                                                                                      | Yes                            | Yes                               | Yes                                 | Yes                              | Yes                                 | Yes                                    |
| 9. Were the investigators able to confirm that the exposure/risk occurred prior to the development of the condition or event that defined a participant as a case?                                            | Yes                            | Yes                               | No                                  | Yes                              | Yes                                 | Yes                                    |
| 10. Were the measures of exposure/risk clearly defined, valid, reliable, and implemented consistently (including the same time period) across all study participants?                                         | Yes                            | Yes                               | Yes                                 | Yes                              | Yes                                 | Yes                                    |
| 11. Were the assessors of exposure/risk blinded to the case or control status of participants?                                                                                                                | *                              | *                                 | *                                   | Yes                              | *                                   | Yes                                    |
| 12. Were key potential confounding variables measured and adjusted statistically in the analyses? If matching was used, did the investigators account for matching during study analysis?                     | Yes                            | Yes                               | Yes                                 | Yes                              | Yes                                 | Yes                                    |
| Total                                                                                                                                                                                                         | 9                              | 9                                 | 8                                   | 12                               | 9                                   | 10                                     |

Yes = 1; No = 0; Unable to determine = 0. \*unable to determine. <https://www.nhlbi.nih.gov/health-topics/study-quality-assessment-tools>

11
